# Supplementary material for: Improved efficiency of doubled haploid generation in hexaploid triticale by in vitro chromosome doubling
Source: PubMed Central journal article supplement (PMC3443072; doi:10.1186/1471-2229-12-109), 2012-07-18
Supplement: 1471-2229-12-109-S1.pdf [file 1471-2229-12-109-S1.pdf]

# Improved efficiency of doubled haploid generation in hexaploid Triticale by *in vitro* chromosome doubling

Tobias Würschum<sup>1\*</sup>, Matthew R. Tucker<sup>2</sup>, Jochen C. Reif<sup>1</sup>, and Hans Peter Maurer<sup>1</sup>

Institutional address:

<sup>1</sup> Tobias Würschum, Jochen C. Reif, Hans Peter Maurer, State Plant Breeding Institute, University of Hohenheim, 70593 Stuttgart, Germany,

<sup>2</sup> ARC Centre of Excellence for Plant Cell Walls, University of Adelaide, Waite Campus, Urrbrae SA 5064, Australia

\* Corresponding author: Tobias Würschum [tobias.wuerschum@uni-hohenheim.de](mailto:tobias.wuerschum@uni-hohenheim.de)

**Table S1 - Variance component analysis**

|                               | Regeneration rate | Green Plants | Survival rate | Fertile plants | Fertile plants / 100 embryos |
|-------------------------------|-------------------|--------------|---------------|----------------|------------------------------|
| $\sigma^2_{\text{Time}}$      | 1.57e-3           | 2.22e-8      | 7.09e-3       | 3.89e-3*       | 7.43e-9                      |
| $\sigma^2_{\text{Conc}}$      | 2.37e-8           | 2.22e-8      | 2.03e-8       | 8.32e-3**      | 3.49e-4*                     |
| $\sigma^2_{\text{Time:Conc}}$ | 1.30e-8           | 4.67e-4      | 8.40e-3       | 2.37e-8        | 7.43e-9                      |

\*, \*\* indicate significance at  $P < 0.1$  and  $P < 0.05$ , respectively

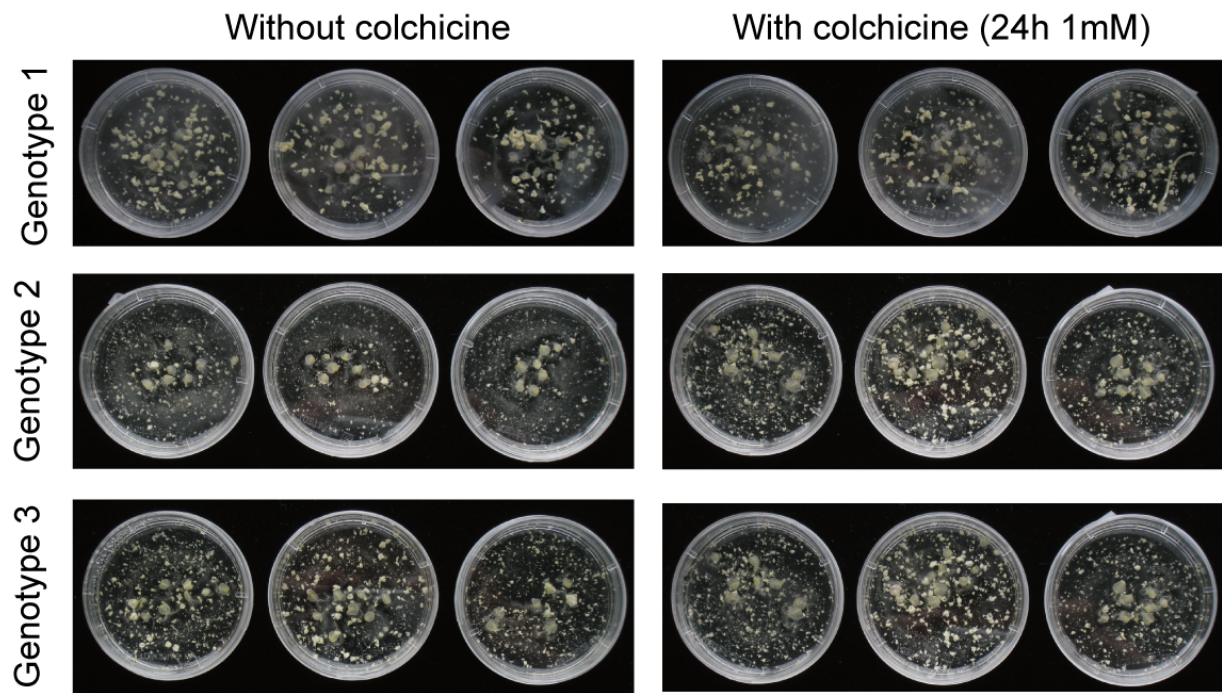

**Figure S1 - Effect of *in vitro* chromosome doubling on embryogenesis**

Results are shown for three different genotypes (F<sub>1</sub> crosses) for the classical approach where the microspores are placed in Petri dishes directly after isolation, and for the approach presented here including an *in vitro* colchicine step (1 mM for 24h).
